# Supplementary material for: Adverse Reactions after the Third Dose of the BNT162b2 mRNA COVID-19 Vaccine among Medical School Residents in a Regional Reference University Hospital in Italy
Source: MDPI journal article supplement (doi:10.3390/vaccines10111779), 2022-10-22
Supplement: s1 [file s1]

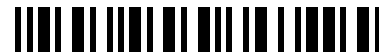

**Questo questionario è finalizzato a indagare le reazioni locali e sistemiche della vaccinazione mRNA COVID-19. Si prega il partecipante di compilare con attenzione il questionario relativo ai 7 giorni a partire da quello della vaccinazione. Questi dati sono molto importanti in ambito di ricerca applicata durante la campagna vaccinale in Italia.**

**Il questionario può essere salvato, ripreso e modificato fino all'invio da parte del partecipante o alla scadenza prevista.**

## Sezione A: Sezione 1 - Anagrafica

**A1. Nome e Cognome**

**A2. Genere**

Femminile ☐

Maschile ☐

Non-binario ☐

**A3. Età**

**A4. Quante settimane sono trascorse dalla somministrazione della terza dose?**

**A5. Quanti mesi sono trascorsi tra la seconda e la terza somministrazione di vaccino anti-SARS-CoV-2?**

## Sezione B: Sezione 2 - Vaccino COVID-19 mRNA: EFFETTI LOCALI

**B1. Hai avuto arrossamento in sede di iniezione nei 7 giorni successivi alla somministrazione?**

*Se AFFERMATIVO, inserire il grado di intensità della reazione (1= Lieve: >2,0 a 5,0 cm; 2= moderato: >5,0 a 10,0 cm; 3= grave: >10,0 cm; 4= grado 4: necrosi o dermatite esfoliativa) e il numero di giorni di persistenza; se NEGATIVO inserire 0 in entrambi i campi.*

Grado di intensità

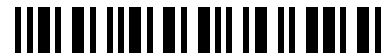

Numero giorni di persistenza

**B2. Hai avuto gonfiore in sede di iniezione nei 7 giorni successivi alla somministrazione?**

*Se AFFERMATIVO, inserire il grado di intensità della reazione (1= Lieve: >2,0 a 5,0 cm; 2= moderato: >5,0 a 10,0 cm; 3= grave: >10,0 cm; 4= grado 4: necrosi) e il numero di giorni di persistenza; se NEGATIVO inserire 0 in entrambi i campi.*

Grado di intensità

Numero giorni di persistenza

**B3. Hai avuto dolore in sede di iniezione nei 7 giorni successivi alla somministrazione?**

*Se AFFERMATIVO, inserire il grado di intensità della reazione (1= Lieve: non interferisce con l'attività; 2= moderato: interferisce con l'attività; 3= grave: impedisce l'attività quotidiana; 4= grado 4: visita al pronto soccorso o ricovero in ospedale per forte dolore al sito di iniezione) e il numero di giorni di persistenza; se NEGATIVO inserire 0 in entrambi i campi.*

Numero giorni di persistenza

Grado di intensità

**Sezione C: Sezione 2 - Vaccino COVID-19 mRNA: EFFETTI SISTEMICI**

**C1. Hai avuto febbre nei 7 giorni successivi alla somministrazione?**

*Se AFFERMATIVO, inserire il grado di intensità della reazione (1=  $\geq 37,5-38,0^{\circ}\text{C}$ ; 2=  $>38,0-38,5^{\circ}\text{C}$ ; 3=  $>38,5-39,0^{\circ}\text{C}$ ; 4=  $>39,0-40,0^{\circ}\text{C}$ ; 5=  $>40,0^{\circ}\text{C}$ ) e il numero di giorni di persistenza; se NEGATIVO inserire 0 in entrambi i campi.*

Grado di intensità

Numero giorni di persistenza

**C2. Hai avuto astenia nei 7 giorni successivi alla somministrazione?**

*Se AFFERMATIVO, inserire il grado di intensità della reazione (1= Lieve: non interferisce con l'attività; 2= moderato: una limitata interferenza con l'attività; 3= grave: impedisce l'attività quotidiana; 4= grado 4: visita al pronto soccorso o ricovero in ospedale per grave affaticamento) e il numero di giorni di persistenza; se NEGATIVO inserire 0 in entrambi i campi.*

Grado di intensità

Numero giorni di persistenza

**C3. Hai avuto brividi nei 7 giorni successivi alla somministrazione?**

*Se AFFERMATIVO, inserire il numero di giorni di persistenza; se NEGATIVO inserire 0 nel campo.*

Numero giorni di persistenza

**C4. Hai avuto cefalea nei 7 giorni successivi alla somministrazione?**

*Se AFFERMATIVO, inserire il grado di intensità della reazione (1= Lieve: non interferisce con l'attività; 2= moderato: una limitata interferenza con l'attività; 3= grave: impedisce l'attività quotidiana; 4= grado 4: visita al pronto soccorso o ricovero in ospedale per forte mal di testa) e il numero di giorni di persistenza; se NEGATIVO inserire 0 in entrambi i campi.*

Grado di intensità

Numero giorni di persistenza

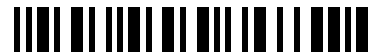

**C5. Hai avuto mialgie/artralgie nei 7 giorni successivi alla somministrazione?**

*Se AFFERMATIVO, inserire il grado di intensità della reazione (1= Lieve: non interferisce con l'attività; 2= moderato: una limitata interferenza con l'attività; 3= grave: impedisce l'attività quotidiana; 4= grado 4: visita al pronto soccorso o ricovero in ospedale per forte dolore muscolare o forte dolore alle articolazioni) e il numero di giorni di persistenza; se NEGATIVO inserire 0 in entrambi i campi.*

Grado di intensità

Numero giorni di persistenza

**C6. Hai avuto sintomi gastrointestinali nei 7 giorni successivi alla somministrazione?**

*Se AFFERMATIVO, inserire il grado di intensità della reazione (1= Lieve: vomitare 1 o 2 volte in 24 ore e/o 2 o 3 feci molle in 24 ore; 2= moderato: vomitare >2 volte in 24 ore e/o 4 o 5 feci molle in 24 ore; 3= grave: richiede idratazione endovenosa e/o 6 o più feci molle in 24 ore; 4= grado 4: visita al pronto soccorso o ricovero ospedaliero; se NEGATIVO inserire 0 in entrambi i campi.*

Grado di intensità

Numero giorni di persistenza

**C7. Hai utilizzato farmaci antipiretici o antidolorifici nei 7 giorni successivi alla somministrazione?**

*Se AFFERMATIVO, inserire il numero di giorni di utilizzo; se NEGATIVO inserire 0 nel campo.*

Numero giorni di utilizzo

**Sezione D: Sezione 2 - Vaccino COVID-19 mRNA: EVENTI AVVERSI RARI**

**D1. Hai avuto linfadenomegalia nei 7 giorni successivi alla somministrazione?**

*Se AFFERMATIVO, inserire il numero di giorni di persistenza; se NEGATIVO inserire 0 nel campo.*

Numero giorni di persistenza

**D2. Hai avuto sintomi a carico del sistema nervoso nei 7 giorni successivi alla somministrazione?**

*Se AFFERMATIVO, inserire il numero di giorni di persistenza; se NEGATIVO inserire 0 nel campo.*

Numero giorni di persistenza

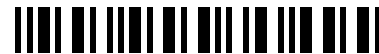

## **Contatti**

**Servizio di Sorveglianza Sanitaria di Ateneo-Medicina del Lavoro Largo Rosanna Benzi 10, 16132 Genova Padiglione 3 Email:  
uos.sorveglianzasanitaria2@hsanmartino.it - sorvsanitaria@unige.it**

**Medici Specialisti e Medici Competenti: Prof. Paolo Durando - durando@unige.it;  
Dott.ssa Nicoletta Debarbieri - nicoletta.debarbieri@hsanmartino.it; Prof. Guglielmo  
Dini - guglielmo.dini@unige.it**

**Servizio di Igiene Largo Rosanna Benzi 10, 16132 Genova Padiglione 3 Email:  
igiene.segreteria@hsanmartino.it - ambulatorio.vaccinazioni@hsanmartino.it**

**Medici Specialisti: Prof. Giancarlo Icardi - icardi@unige.it; Dott.ssa Bianca Bruzzone  
- bianca.bruzzone@hsanmartino.it; Prof. Andrea Orsi - andrea.orsi@unige.it;  
Prof.ssa Laura Sticchi - laura.sticchi@unige.it**

**Grazie per aver partecipato all'indagine.**
